# Supplementary material for: Effects of the Combinations of Rhizobacteria, Mycorrhizae, and Seaweed, and Supplementary Irrigation on Growth and Yield in Wheat Cultivars
Source: MDPI journal article supplement (doi:10.3390/plants10040811), 2021-04-20
Supplement: s1 [file s1]

# Effects of the Combinations of Rhizobacteria, Mycorrhizae, and Seaweed, and Supplementary Irrigation on Growth and Yield in Wheat Cultivars

Z. Najafi Vafa <sup>1,\*</sup>, Y Sohrabi <sup>1</sup>, R. Z. Sayyed <sup>2</sup>, Ni Luh Suriani <sup>3</sup> and Rahul Datta <sup>4,\*</sup>

**Table 1.** Physicochemical properties of the soil before planting in two years of experiment.

| Soil Characteristics                         | 2017–2018 | 2018–2019 |
|----------------------------------------------|-----------|-----------|
| Depth of Soil (cm)                           | 0–30      | 0–30      |
| Soil Texture                                 | Loam      | Clay      |
| Electrical Conductivity (dsm <sup>-1</sup> ) | 362       | 0.505     |
| pH                                           | 7.17      | 7.18      |
| Available K (mg/Kg)                          | 214.18    | 250.80    |
| Available P (mg/Kg)                          | 14.87     | 18.2      |
| Total Organic Carbon (%)                     | 4.91      | 5.33      |
| Total Nitrogen (%)                           | 0.105     | 0.137     |

**Table 2.** The correlation coefficient of studied traits in wheat.

|                             | Plant Height | Tiller Number | Spike Length | Spike Weight | Seed/Spike | No. of Spike/m <sup>2</sup> | 1000-Seed wt | Grain Yield |
|-----------------------------|--------------|---------------|--------------|--------------|------------|-----------------------------|--------------|-------------|
| Plant Height                | 1            |               |              |              |            |                             |              |             |
| Tiller Number               | 0.47 **      | 1             |              |              |            |                             |              |             |
| Spike Length                | 0.03 ns      | -0.11 ns      | 1            |              |            |                             |              |             |
| Spike Weight                | 0.02 ns      | 0.03 ns       | 0.62 **      | 1            |            |                             |              |             |
| (Seed/Spike)                | 0.43 **      | 0.47 **       | -0.15 *      | -0.01 ns     | 1          |                             |              |             |
| No. of Spike/m <sup>2</sup> | 0.59**       | 0.28 **       | -0.17 *      | -0.20 **     | 0.39 **    | 1                           |              |             |
| 1000 Seed Weight            | 0.51 **      | 0.44 **       | 0.04 ns      | 0.09 ns      | 0.68 **    | 0.43 **                     | 1            |             |
| Grain Yield                 | 0.14 ns      | -0.05 ns      | -0.31 **     | -0.29 **     | 0.07 ns    | 0.52 **                     | -0.04 ns     | 1           |

\*\* and \*: significant in 1% and 5% level, respectively.
